# Supplementary material for: Novel adamantane-based hole transport materials for perovskite solar cells: a computational approach
Source: Royal Society of Chemistry journal article supplement (doi:10.1039/c8cp07515h), 2019-01-01
Supplement: c8cp07515h1.pdf [file c8cp07515h1.pdf]

## **ELECTRONIC SUPPLEMENTARY INFORMATION**

Novel Adamantane-based Hole Transport Materials for Perovskite Solar Cells: A  
Computational Approach

Maebienne Anjelica B. Gapol and Dong Hee Kim\*

Department of Chemistry, Kunsan National University, Kunsan, 573-701, Republic of Korea

Table S1. Difference of the calculated adiabatic ground state oxidation potential (GSOP<sub>a</sub>) from the experimental HOMO (HOMO<sub>expt</sub>) of Ad-OMeTPA calculated at DFT/6-31G(d,p) in DCM.

| Exchange-Correlation Density Functionals |                                                            |                 |
|------------------------------------------|------------------------------------------------------------|-----------------|
| Global Hybrid                            | Difference (GSOP <sub>a</sub> -HOMO <sub>expt</sub> ) (eV) |                 |
| B3LYP                                    | 0.23                                                       |                 |
| APF                                      | 0.13                                                       |                 |
| SOGGA11X                                 | -0.05                                                      |                 |
| BHandHLYP                                | -0.21                                                      |                 |
| Range-Separated Hybrid                   | $\omega$ (Bohr <sup>-1</sup> )                             | Difference (eV) |
| LC- $\omega$ PBE                         | 0.40                                                       | -1.01           |
| <b>CAM-B3LYP</b>                         | 0.33                                                       | -0.36           |
|                                          | 0.20                                                       | -0.13           |
|                                          | 0.175                                                      | -0.07           |
|                                          | <b>0.15</b>                                                | <b>0.00</b>     |

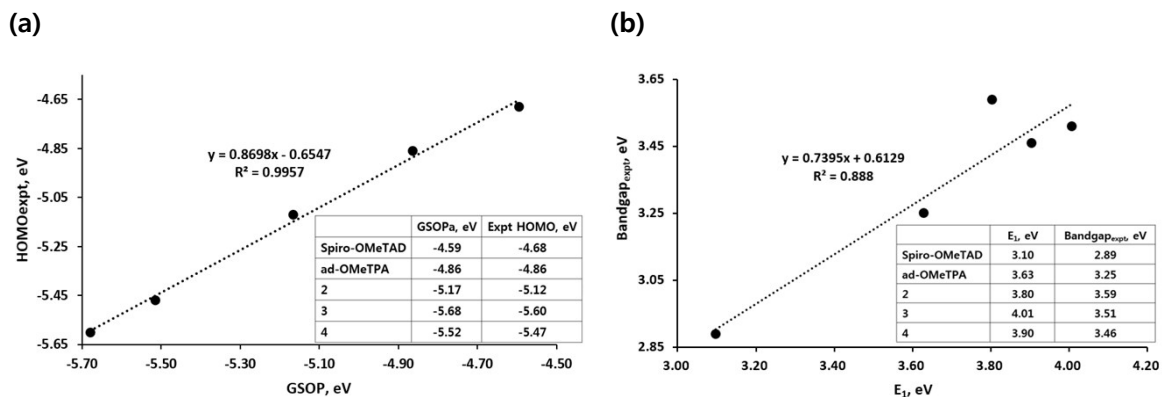

Figure S1. (a) Linear correlation of the experimental HOMO(HOMO<sub>expt</sub>) versus the calculated ground state oxidation potential (GSOP) of the reference molecules<sup>1, 2</sup> calculated using CAM-B3LYP/6-31G(d,p),  $\omega=0.15$  in DCM. (b) Linear correlation of the experimental bandgap (Bandgap<sub>expt</sub>) and first excited state energy ( $E_1$ ) calculated using TD-DFT//CAM-B3LYP/6-31G(d,p) in DCM.

Table S2. Difference of the calculated first excited state energy ( $E_1$ ) and experimental optical band gap ( $E_{g,\text{expt}}$ ) using TD-DFT//CAM-B3LYP/6-31G(d,p) in DCM.

| Exchange-Correlation Density Functionals | Difference ( $E_1 - E_{g,\text{expt}}$ ) (eV) |
|------------------------------------------|-----------------------------------------------|
| <b>B3LYP/6-31G(d,p)</b>                  | <b>0.38</b>                                   |
| SOGGA11-X/6-31G(d,p)                     | 0.88                                          |
| CAM-B3LYP/6-31G(d,p)                     | 0.97                                          |

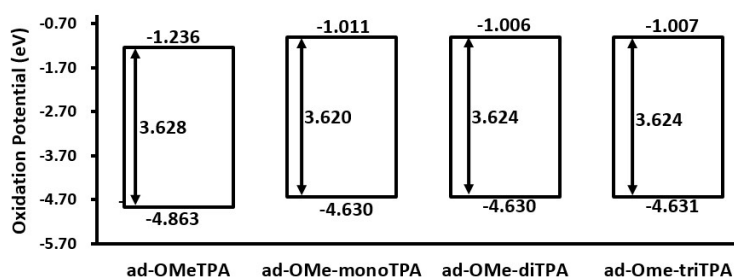

Figure S2. Ground state oxidation potential (GSOP) and excited state oxidation potential (ESOP) of the adamantane derivatives calculated using CAM-B3LYP with  $\omega=0.15$  and TD-B3LYP//CAM-B3LYP, respectively, in DCM.

Table S3. Hole reorganization energy ( $\lambda_h$ ) and its components ( $\lambda^+$  and  $\lambda^0$ ) calculated at CAM-B3LYP with  $\omega=0.15$  in DCM.

|                | $\lambda_h$ (eV) | $\lambda^+$ (eV) | $\lambda^0$ (eV) |
|----------------|------------------|------------------|------------------|
| ad-OMeTPA      | 0.125            | 0.067            | 0.058            |
| ad-OMe-monoTPA | 0.232            | 0.120            | 0.112            |
| ad-OMe-diTPA   | 0.237            | 0.124            | 0.113            |
| ad-Ome-triTPA  | 0.444            | 0.330            | 0.114            |
|                |                  |                  |                  |
| Spiro-OMeTAD   | 0.139            | 0.067            | 0.073            |
| ad-EtTPA       | 0.048            | 0.022            | 0.025            |
| ad-tBuTPA      | 0.316            | 0.248            | 0.068            |
| ad-SMeTPA      | 0.343            | 0.265            | 0.078            |
| ad-NMeTPA      | 0.571            | 0.408            | 0.163            |

Table S4. The calculated dihedral angles of the optimized neutral and cationic geometries of the adamantane derivatives at CAM-B3LYP with  $\omega=0.15$  in DCM.

| Quadrant | Designation | ad-OMeTPA      |               |                | ad-EtTPA       |               |                | ad-tBuTPA |         |                |
|----------|-------------|----------------|---------------|----------------|----------------|---------------|----------------|-----------|---------|----------------|
|          |             | Neutral        | Cation        | $ \Delta\phi $ | Neutral        | Cation        | $ \Delta\phi $ | Neutral   | Cation  | $ \Delta\phi $ |
| Q1       | D1          | 32.100         | 31.172        | 0.927          | 38.813         | 35.702        | 3.111          | 38.608    | 37.555  | 1.053          |
|          | D2          | 30.915         | 30.530        | 0.385          | 38.847         | 36.357        | 2.490          | 39.979    | 39.103  | 0.876          |
|          | D3          | 0.143          | 0.131         | 0.012          | -87.514        | -88.474       | 0.960          | -58.922   | -59.053 | 0.130          |
|          | D4          | 0.475          | 0.299         | 0.176          | -88.638        | -87.100       | 1.538          | -0.622    | -0.609  | 0.013          |
| Q2       | D1          | 32.159         | 35.402        | 3.243          | 37.811         | 34.814        | 2.997          | 37.391    | 36.099  | 1.292          |
|          | D2          | 33.621         | 35.510        | 1.889          | 37.991         | 34.797        | 3.194          | 36.378    | 35.303  | 1.075          |
|          | D3          | 0.460          | -0.158        | 0.618          | -89.966        | -88.606       | 1.360          | -59.763   | -60.048 | 0.285          |
|          | D4          | 0.506          | -0.148        | 0.654          | -86.576        | -87.480       | 0.904          | -59.893   | -60.039 | 0.146          |
| Q3       | D1          | 30.915         | 30.531        | 0.384          | 38.834         | 35.700        | 3.134          | 39.457    | 35.604  | 3.853          |
|          | D2          | 32.100         | 31.172        | 0.928          | 38.800         | 35.109        | 3.691          | 39.235    | 35.164  | 4.071          |
|          | D3          | 0.475          | 0.299         | 0.176          | -88.649        | -87.523       | 1.126          | 0.311     | 0.077   | 0.233          |
|          | D4          | 0.143          | 0.131         | 0.013          | -87.516        | -87.749       | 0.232          | -60.087   | -59.822 | 0.264          |
| Q4       | D1          | 32.159         | 35.409        | 3.250          | 37.818         | 35.990        | 1.828          | 40.030    | 37.750  | 2.280          |
|          | D2          | 33.621         | 35.518        | 1.897          | 37.999         | 36.760        | 1.239          | 39.712    | 37.782  | 1.931          |
|          | D3          | 0.460          | -0.158        | 0.618          | -89.969        | -87.698       | 2.271          | -60.041   | -59.507 | 0.534          |
|          | D4          | 0.505          | -0.148        | 0.653          | -86.574        | -89.034       | 2.460          | -60.090   | -59.330 | 0.760          |
|          |             |                |               |                |                |               |                |           |         |                |
| Quadrant | Designation | ad-SMeTPA      |               |                | ad-NMeTPA      |               |                |           |         |                |
|          |             | Neutral        | Cation        | $ \Delta\phi $ | Neutral        | Cation        | $ \Delta\phi $ |           |         |                |
| Q1       | D1          | 47.331         | 44.307        | 3.024          | 29.144         | 26.803        | 2.341          |           |         |                |
|          | D2          | 46.800         | 44.989        | 1.811          | 29.759         | 26.313        | 3.446          |           |         |                |
|          | D3          | -71.560        | -66.890       | 4.670          | -13.088        | -13.167       | 0.079          |           |         |                |
|          | D4          | -70.624        | -72.053       | 1.429          | -13.225        | -13.289       | 0.063          |           |         |                |
| Q2       | D1          | 46.697         | 44.605        | 2.093          | 27.600         | 27.389        | 0.211          |           |         |                |
|          | D2          | 47.124         | 44.976        | 2.148          | 27.676         | 28.729        | 1.053          |           |         |                |
|          | D3          | -73.120        | -63.068       | 10.051         | -12.896        | -12.654       | 0.242          |           |         |                |
|          | D4          | -72.375        | -71.554       | 0.822          | -13.222        | -12.799       | 0.422          |           |         |                |
| Q3       | D1          | 42.998         | 40.230        | 2.768          | 29.759         | 44.462        | 14.704         |           |         |                |
|          | D2          | 43.732         | 41.575        | 2.158          | 29.145         | 44.498        | 15.353         |           |         |                |
|          | D3          | -1.136         | -1.299        | 0.163          | <b>-13.224</b> | <b>-1.185</b> | <b>12.039</b>  |           |         |                |
|          | D4          | -82.685        | -78.294       | 4.391          | <b>-13.088</b> | <b>-1.310</b> | <b>11.778</b>  |           |         |                |
| Q4       | D1          | 42.960         | 42.003        | 0.957          | 27.600         | 27.301        | 0.299          |           |         |                |
|          | D2          | 44.754         | 41.789        | 2.965          | 27.676         | 28.105        | 0.429          |           |         |                |
|          | D3          | -1.513         | -1.225        | 0.288          | -12.897        | -13.110       | 0.213          |           |         |                |
|          | D4          | <b>-77.387</b> | <b>-0.943</b> | <b>76.444</b>  | -13.221        | -12.781       | 0.441          |           |         |                |

(a)

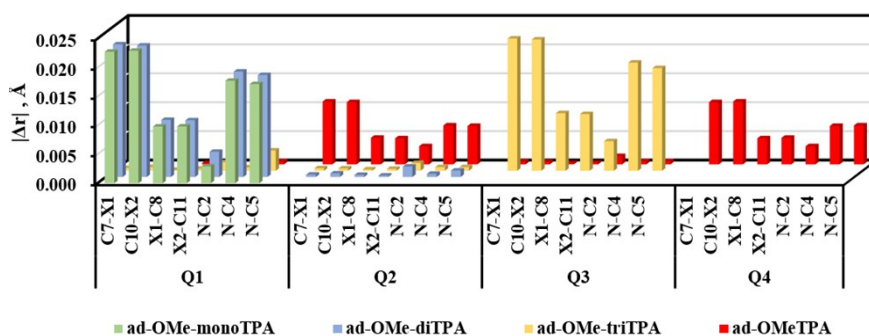

(b)

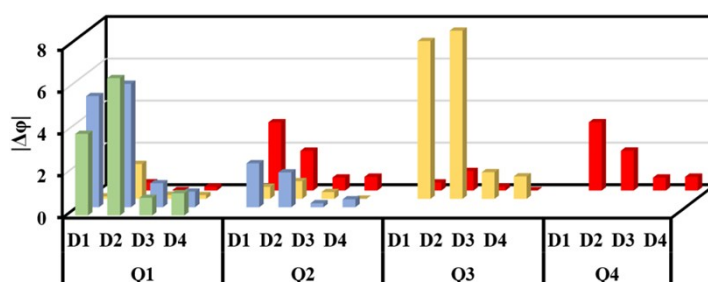

Figure S3. (a) Bond length difference (Å) and (b) dihedral angle difference (°) of the ground state neutral molecule and corresponding cationic structures of each adamantane derivatives calculated at CAM-B3LYP with  $\omega=0.15$  in DCM.

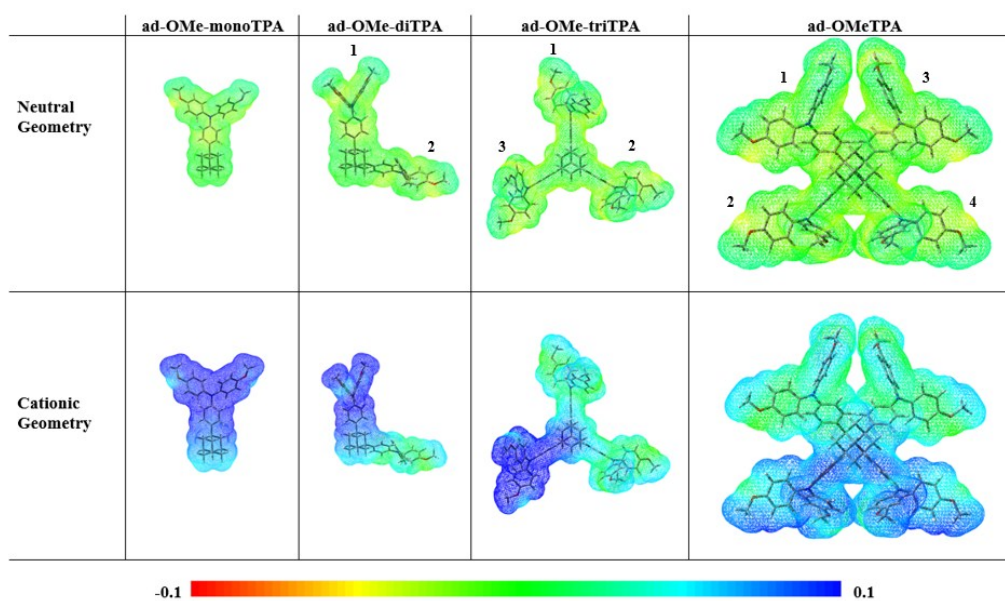

Figure S4. The ESP mapped onto the total electron density of the neutral and cationic geometries of the derivatives. Regions of high and low potentials are indicated in red and blue, respectively.

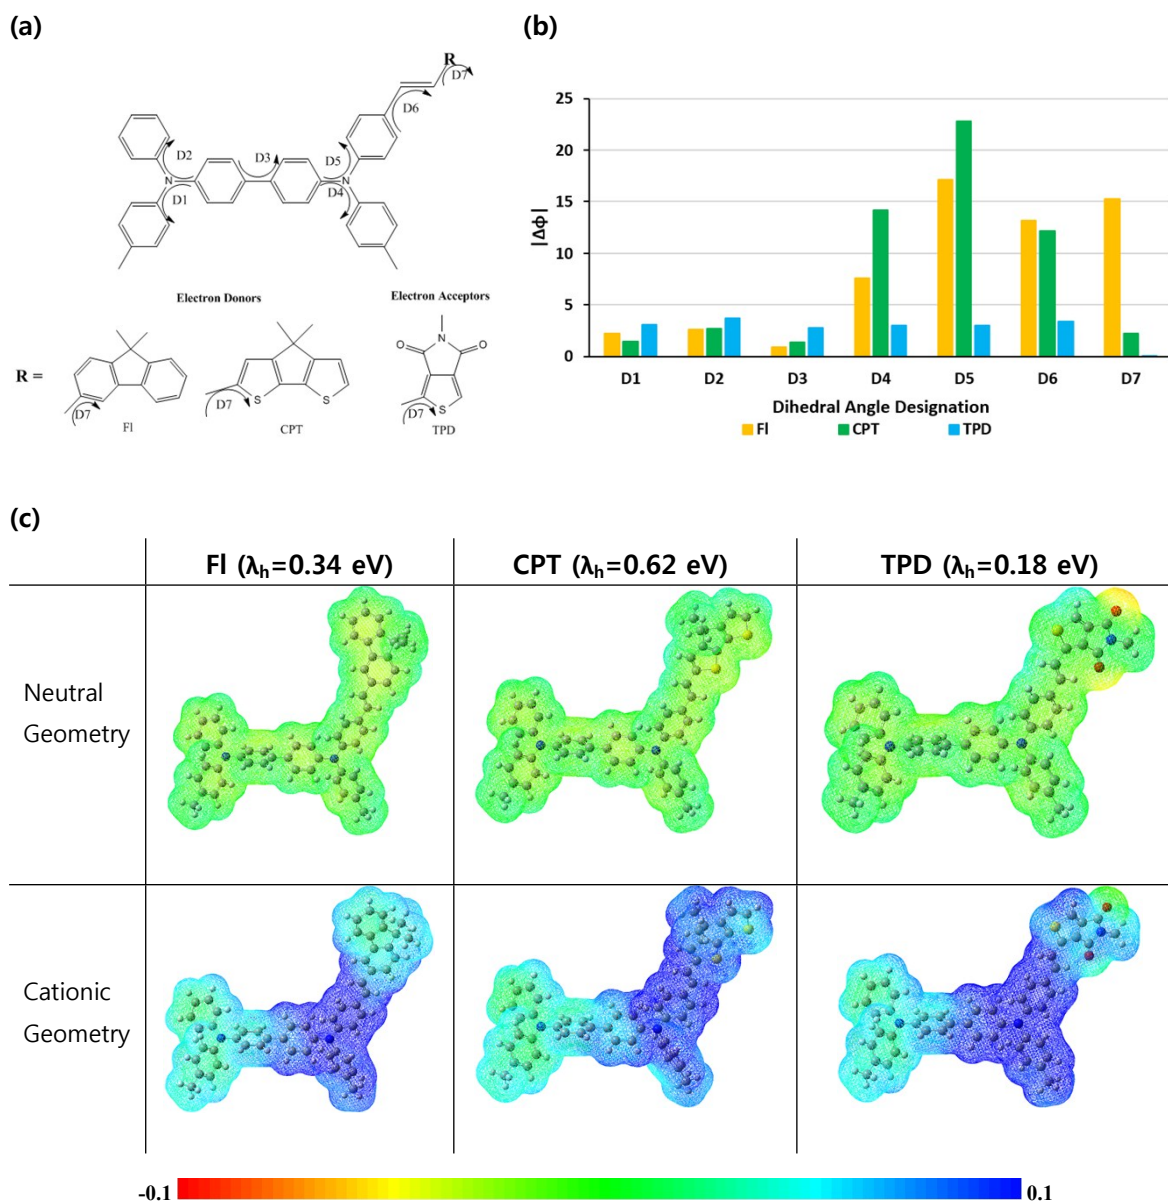

Figure S5. **(a)** Dihedral angle designation and **(b)** the absolute dihedral angle changes ( $|\Delta\Phi|$ ) between the neutral and cationic form of TPB based molecules. **(c)** The electrostatic potential maps of the derivatives. These structures were calculated at LC- $\omega$ PBE/6-31G(d,p) in DCM.

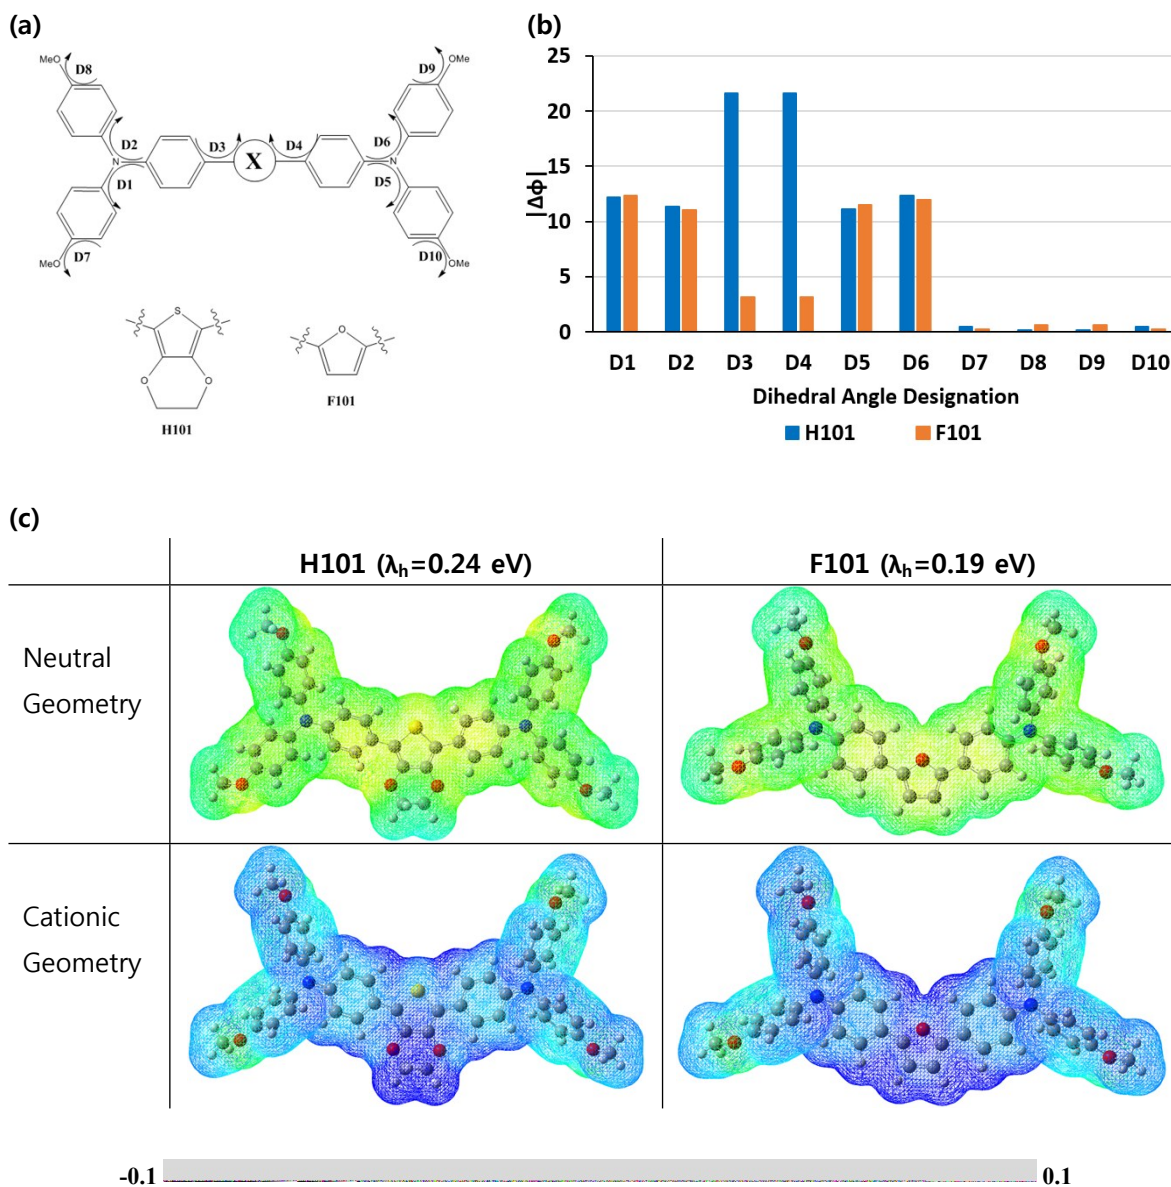

Figure S6. (a) Dihedral angle designation and (b) the absolute dihedral angle changes ( $|\Delta\Phi|$ ) between the neutral and cationic form of TPA based molecules. (c) The electrostatic potential maps of the derivatives. These structures were calculated at LC- $\omega$ PBE/6-31G(d,p) in DCM.

## References

- Zhang, K.; Wang, L.; Liang, Y.; Yang, S.; Liang, J.; Cheng, F.; Chen, J. *Synthetic Metals* **2012**, 162, (5-6), 490-496.
- Gu, Y.; Zhou, X.; Li, Y.; Wu, K.; Wang, F.; Huang, M.; Guo, F.; Wang, Y.; Gong, S.; Ma, D.; Yang, C. *Organic Electronics* **2015**, 25, 193-199.
